# Supplementary material
Source: Frontiers journal article supplement (https://www.frontiersin.org/articles/335838)
Supplement: Image_1.PDF [file Image_1.PDF]

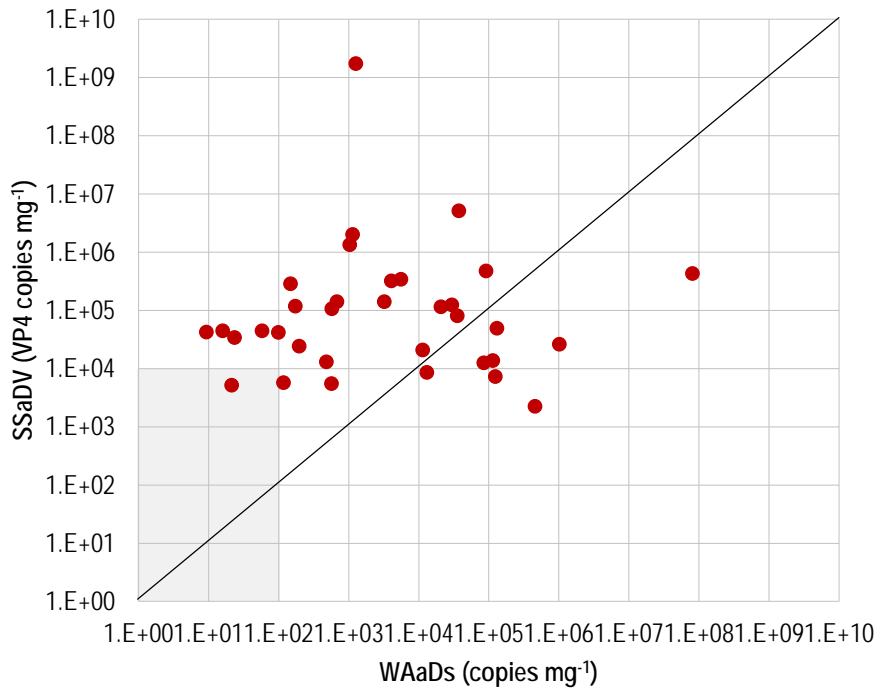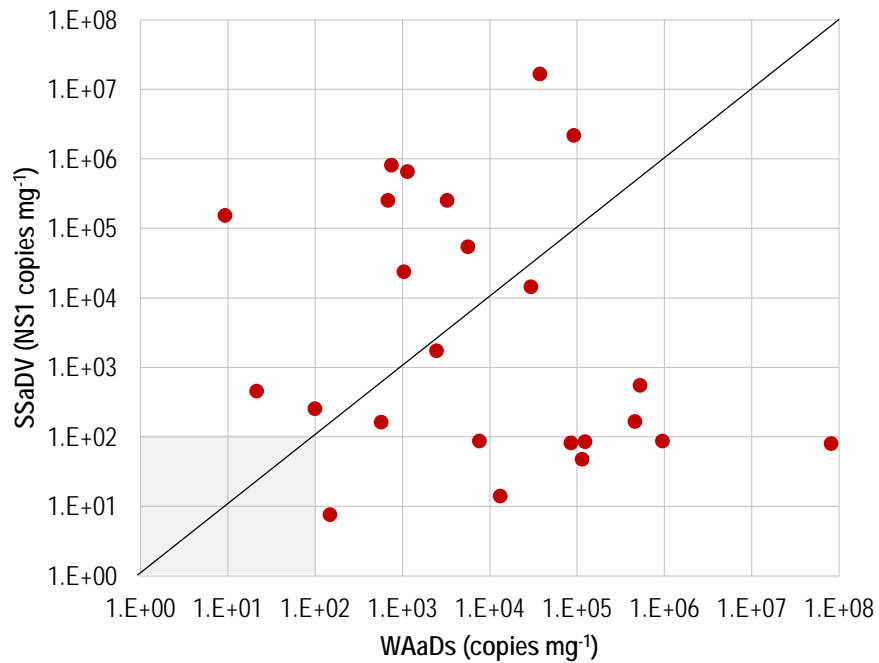

**Supplemental Figure 1:** Comparison of sea star densovirus loads as measured using the WAADs and the VP4 (top) and NS1 (bottom) primer/probe sets. The solid line equates to equal detection. The shaded region indicates the practical detection threshold, which is based on linearity of standards and negative controls
