# Supplementary material
Source: Frontiers journal article supplement (https://www.frontiersin.org/articles/335838)
Supplement: Image_4.PDF [file Image_4.PDF]

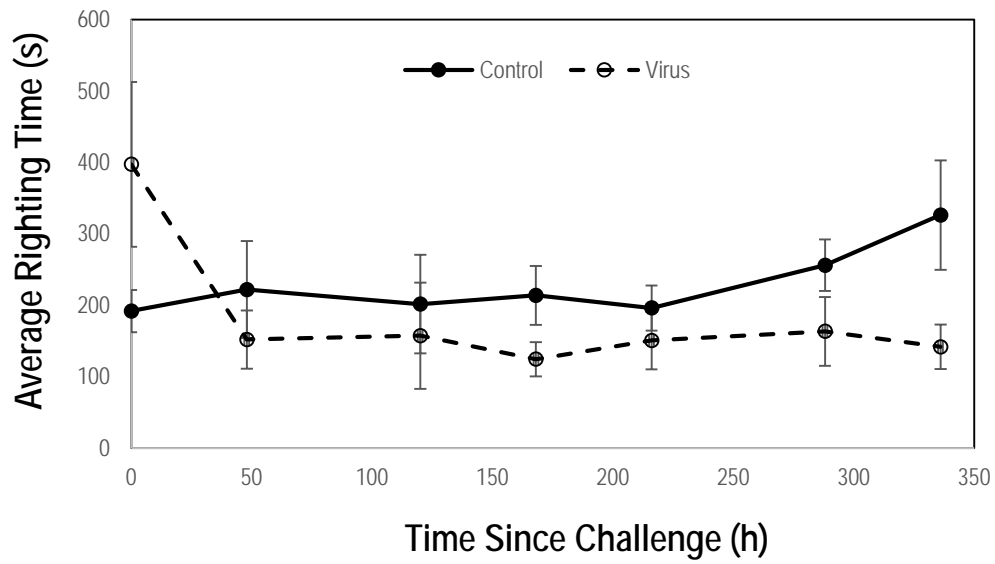

**Supplemental Figure 4:** Average righting time of *Asterias forbesii* challenged with virus-sized material from *Pisaster ochraceus* in aquaria.
