# Supplementary material
Source: Frontiers journal article supplement (https://www.frontiersin.org/articles/335838)
Supplement: Image_5.PDF [file Image_5.PDF]

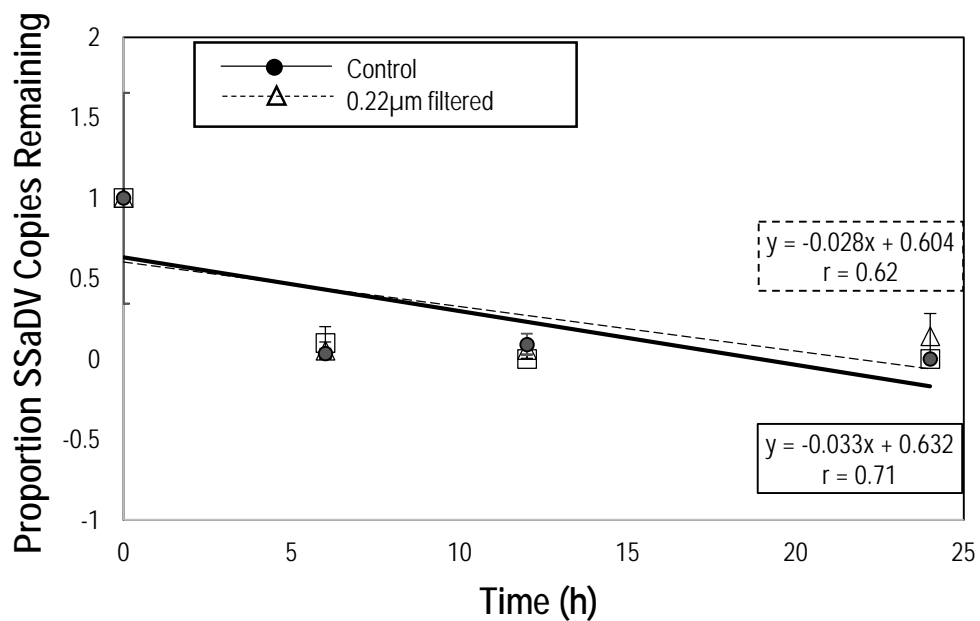

**Supplemental Figure 5:** Decay rate of SSaDV in pelagic seawater as measured in whole seawater incubations and incubations that were filtered to remove particles.
