# Supplementary material
Source: Frontiers journal article supplement (https://www.frontiersin.org/articles/335838)
Supplement: Image_7.PDF [file Image_7.PDF]

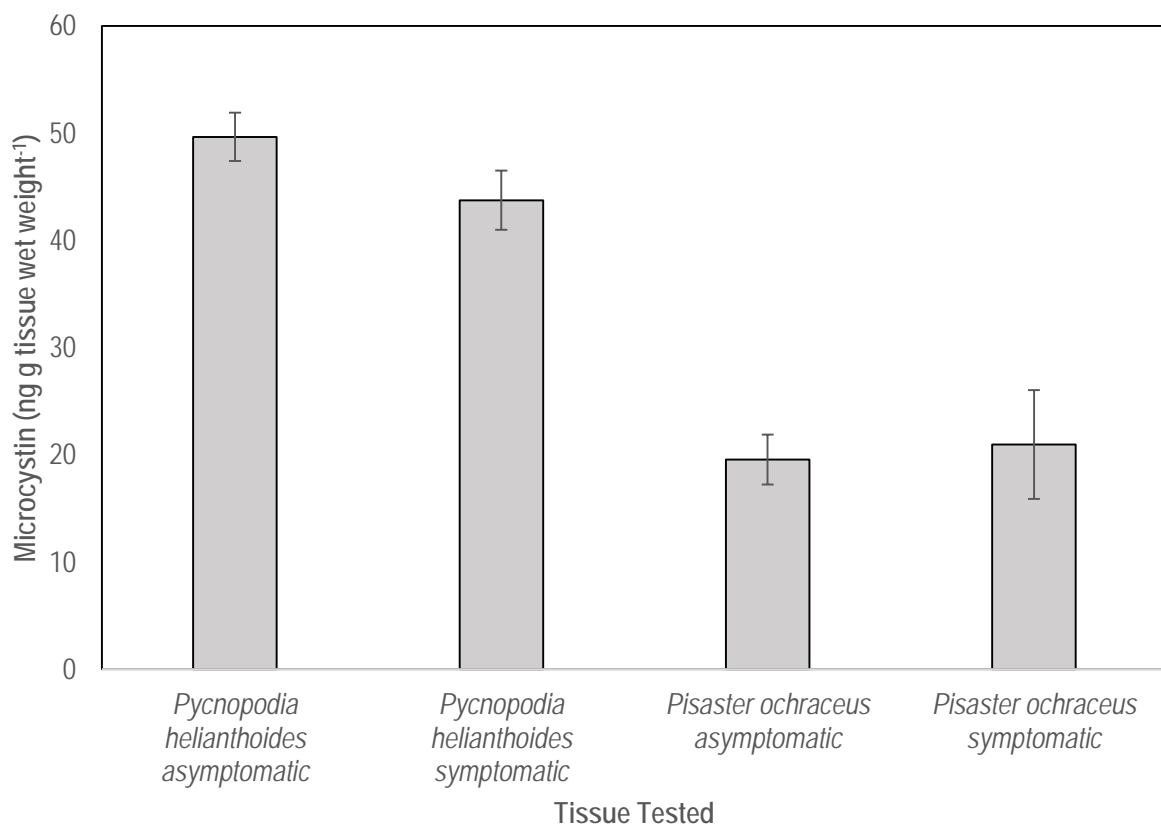

**Supplemental Figure 7:** Microcystin concentrations measured in asymptomatic and SSWD-affected *Pycnopodia helianthoides* and *Pisaster ochraceus* collected in 2013 from the Seattle Aquarium and Olympic National Park, respectively.
