# Supplementary material
Source: Frontiers journal article supplement (https://www.frontiersin.org/articles/335838)
Supplement: Image_8.PDF [file Image_8.PDF]

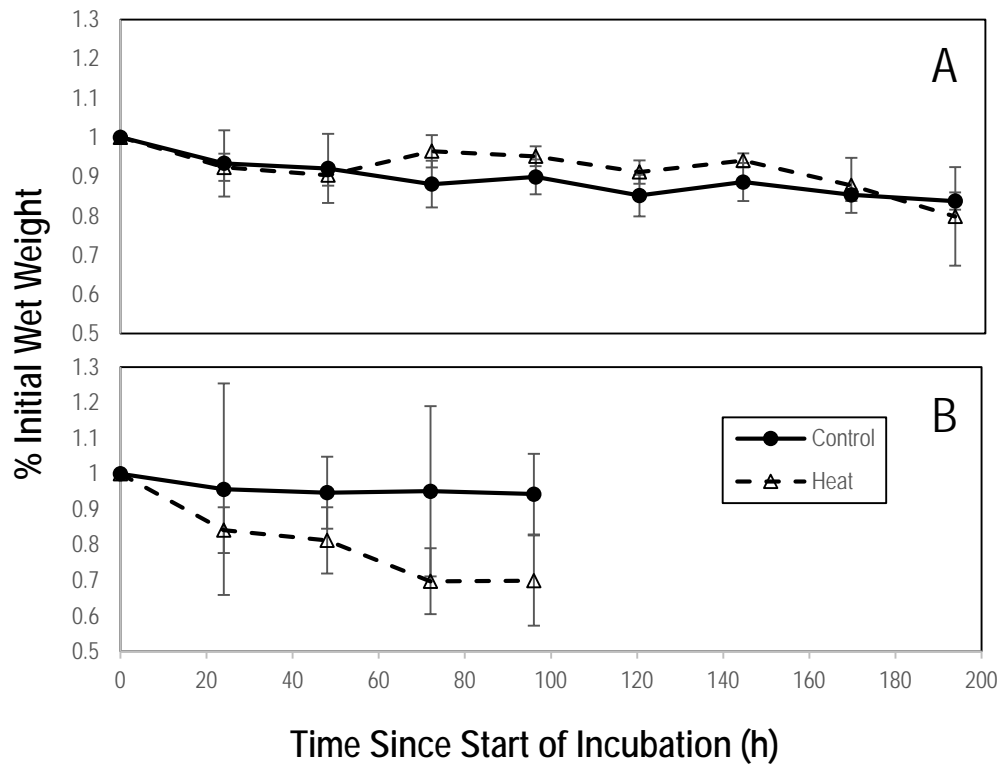

**Supplemental Figure 8:** Impacts of elevated temperature on change in wet weight in (A) *Pisaster ochraceus* and (B) *Evasterias troscheli*.
