# Supplementary material
Source: Frontiers journal article supplement (https://www.frontiersin.org/articles/335838)
Supplement: Table_4.DOCX [file Table_4.DOCX]

**Supplemental Table 4:** Samples of *P. ochraceus* and *Leptasterias* spp. examined for the presence and load of WAaDs.

| **Sample ID** | **Date_Collected** | **Site** | **Latitude (oN)** | **Longitude (oW)** | **Species** | **Health Category** |
| --- | --- | --- | --- | --- | --- | --- |
| 117 | 5/23/2016 | Boiler Bay | 44.833 | 124.06 | *Pisaster ochraceus* | Asymptomatic |
| 118 | 5/23/2016 | Boiler Bay | 44.833 | 124.06 | *Pisaster ochraceus* | Asymptomatic |
| 119 | 5/23/2016 | Boiler Bay | 44.833 | 124.06 | *Pisaster ochraceus* | Asymptomatic |
| 120 | 5/23/2016 | Boiler Bay | 44.833 | 124.06 | *Pisaster ochraceus* | Asymptomatic |
| 121 | 5/23/2016 | Boiler Bay | 44.833 | 124.06 | *Pisaster ochraceus* | Asymptomatic |
| 98 | 5/23/2016 | Boiler Bay | 44.833 | 124.06 | *Pisaster ochraceus* | SSWD-Affected |
| 99 | 5/23/2016 | Boiler Bay | 44.833 | 124.06 | *Pisaster ochraceus* | SSWD-Affected |
| 100 | 5/23/2016 | Boiler Bay | 44.833 | 124.06 | *Pisaster ochraceus* | SSWD-Affected |
| 101 | 5/23/2016 | Boiler Bay | 44.833 | 124.06 | *Pisaster ochraceus* | SSWD-Affected |
| 102 | 5/23/2016 | Boiler Bay | 44.833 | 124.06 | *Pisaster ochraceus* | SSWD-Affected |
| 103 | 5/23/2016 | Boiler Bay | 44.833 | 124.06 | *Pisaster ochraceus* | SSWD-Affected |
| 104 | 5/23/2016 | Boiler Bay | 44.833 | 124.06 | *Pisaster ochraceus* | SSWD-Affected |
| 106 | 5/23/2016 | Boiler Bay | 44.833 | 124.06 | *Pisaster ochraceus* | SSWD-Affected |
| 108 | 5/23/2016 | Boiler Bay | 44.833 | 124.06 | *Pisaster ochraceus* | SSWD-Affected |
| 109 | 5/23/2016 | Boiler Bay | 44.833 | 124.06 | *Pisaster ochraceus* | SSWD-Affected |
| 110 | 5/23/2016 | Boiler Bay | 44.833 | 124.06 | *Pisaster ochraceus* | SSWD-Affected |
| 111 | 5/23/2016 | Boiler Bay | 44.833 | 124.06 | *Pisaster ochraceus* | SSWD-Affected |
| 112 | 5/23/2016 | Boiler Bay | 44.833 | 124.06 | *Pisaster ochraceus* | SSWD-Affected |
| 113 | 5/23/2016 | Boiler Bay | 44.833 | 124.06 | *Pisaster ochraceus* | SSWD-Affected |
| 114 | 5/23/2016 | Boiler Bay | 44.833 | 124.06 | *Pisaster ochraceus* | SSWD-Affected |
| 115 | 5/23/2016 | Boiler Bay | 44.833 | 124.06 | *Pisaster ochraceus* | SSWD-Affected |
| 116 | 5/23/2016 | Boiler Bay | 44.833 | 124.06 | *Pisaster ochraceus* | SSWD-Affected |
| 379 | 10/20/2016 | Fogarty Creek | 44.8392 | 124.0544 | *Pisaster ochraceus* | Asymptomatic |
| 380 | 10/20/2016 | Fogarty Creek | 44.8392 | 124.0544 | *Pisaster ochraceus* | Asymptomatic |
| 381 | 10/20/2016 | Fogarty Creek | 44.8392 | 124.0544 | *Pisaster ochraceus* | Asymptomatic |
| 382 | 10/20/2016 | Fogarty Creek | 44.8392 | 124.0544 | *Pisaster ochraceus* | Asymptomatic |
| 383 | 10/20/2016 | Fogarty Creek | 44.8392 | 124.0544 | *Pisaster ochraceus* | Asymptomatic |
| 408 | 10/20/2016 | Fogarty Creek | 44.8392 | 124.0544 | *Pisaster ochraceus* | Asymptomatic |
| 409 | 10/20/2016 | Fogarty Creek | 44.8392 | 124.0544 | *Pisaster ochraceus* | Asymptomatic |
| 410 | 10/20/2016 | Fogarty Creek | 44.8392 | 124.0544 | *Pisaster ochraceus* | Asymptomatic |
| 411 | 10/20/2016 | Fogarty Creek | 44.8392 | 124.0544 | *Pisaster ochraceus* | Asymptomatic |
| 412 | 10/20/2016 | Fogarty Creek | 44.8392 | 124.0544 | *Pisaster ochraceus* | Asymptomatic |
| 401 | 10/20/2016 | Fogarty Creek | 44.8392 | 124.0544 | *Pisaster ochraceus* | SSWD-Affected |
| 402 | 10/20/2016 | Fogarty Creek | 44.8392 | 124.0544 | *Pisaster ochraceus* | SSWD-Affected |
| 403 | 10/20/2016 | Fogarty Creek | 44.8392 | 124.0544 | *Pisaster ochraceus* | SSWD-Affected |
| 404 | 10/20/2016 | Fogarty Creek | 44.8392 | 124.0544 | *Pisaster ochraceus* | SSWD-Affected |
| 405 | 10/20/2016 | Fogarty Creek | 44.8392 | 124.0544 | *Pisaster ochraceus* | SSWD-Affected |
| 398 | 10/20/2016 | Fogarty Creek | 44.8392 | 124.0544 | *Pisaster ochraceus* | SSWD-Affected |
| 399 | 10/20/2016 | Fogarty Creek | 44.8392 | 124.0544 | *Pisaster ochraceus* | SSWD-Affected |
| 400 | 10/20/2016 | Fogarty Creek | 44.8392 | 124.0544 | *Pisaster ochraceus* | SSWD-Affected |
| 221 | 8/16/2016 | Smelt Sands | 44.3224 | 124.1072 | *Pisaster ochraceus* | Asymptomatic |
| 222 | 8/16/2016 | Smelt Sands | 44.3224 | 124.1072 | *Pisaster ochraceus* | Asymptomatic |
| 223 | 8/16/2016 | Smelt Sands | 44.3224 | 124.1072 | *Pisaster ochraceus* | Asymptomatic |
| 224 | 8/16/2016 | Smelt Sands | 44.3224 | 124.1072 | *Pisaster ochraceus* | Asymptomatic |
| 226 | 8/16/2016 | Smelt Sands | 44.3224 | 124.1072 | *Pisaster ochraceus* | Asymptomatic |
| 230 | 8/16/2016 | Smelt Sands | 44.3224 | 124.1072 | *Pisaster ochraceus* | SSWD-Affected |
| 240 | 8/16/2016 | Smelt Sands | 44.3224 | 124.1072 | *Pisaster ochraceus* | SSWD-Affected |
| 265 | 8/16/2016 | Smelt Sands | 44.3224 | 124.1072 | *Pisaster ochraceus* | SSWD-Affected |
| 269 | 8/16/2016 | Smelt Sands | 44.3224 | 124.1072 | *Pisaster ochraceus* | SSWD-Affected |
| 277 | 8/16/2016 | Smelt Sands | 44.3224 | 124.1072 | *Pisaster ochraceus* | SSWD-Affected |
| 225 | 8/16/2016 | Smelt Sands | 44.3224 | 124.1072 | *Pisaster ochraceus* | SSWD-Affected |
| 227 | 8/16/2016 | Smelt Sands | 44.3224 | 124.1072 | *Pisaster ochraceus* | SSWD-Affected |
| 237 | 8/16/2016 | Smelt Sands | 44.3224 | 124.1072 | *Pisaster ochraceus* | SSWD-Affected |
| 254 | 8/16/2016 | Smelt Sands | 44.3224 | 124.1072 | *Pisaster ochraceus* | SSWD-Affected |
| 261 | 8/16/2016 | Smelt Sands | 44.3224 | 124.1072 | *Pisaster ochraceus* | SSWD-Affected |
| 264 | 8/16/2016 | Smelt Sands | 44.3224 | 124.1072 | *Pisaster ochraceus* | SSWD-Affected |
| 271 | 8/16/2016 | Smelt Sands | 44.3224 | 124.1072 | *Pisaster ochraceus* | SSWD-Affected |
| 293 | 8/16/2016 | Smelt Sands | 44.3224 | 124.1072 | *Pisaster ochraceus* | SSWD-Affected |
| 299 | 8/16/2016 | Smelt Sands | 44.3224 | 124.1072 | *Pisaster ochraceus* | SSWD-Affected |
| 3 | 4/9/2016 | Strawberry Hill | 44.2541 | 124.1126 | *Pisaster ochraceus* | Asymptomatic |
| 6 | 4/9/2016 | Strawberry Hill | 44.2541 | 124.1126 | *Pisaster ochraceus* | Asymptomatic |
| 9 | 4/9/2016 | Strawberry Hill | 44.2541 | 124.1126 | *Pisaster ochraceus* | Asymptomatic |
| 12 | 4/9/2016 | Strawberry Hill | 44.2541 | 124.1126 | *Pisaster ochraceus* | Asymptomatic |
| 15 | 4/9/2016 | Strawberry Hill | 44.2541 | 124.1126 | *Pisaster ochraceus* | Asymptomatic |
| 168 | 5/25/2016 | Strawberry Hill | 44.2541 | 124.1126 | *Pisaster ochraceus* | Asymptomatic |
| 169 | 5/25/2016 | Strawberry Hill | 44.2541 | 124.1126 | *Pisaster ochraceus* | Asymptomatic |
| 170 | 5/25/2016 | Strawberry Hill | 44.2541 | 124.1126 | *Pisaster ochraceus* | Asymptomatic |
| 171 | 5/25/2016 | Strawberry Hill | 44.2541 | 124.1126 | *Pisaster ochraceus* | Asymptomatic |
| 172 | 5/25/2016 | Strawberry Hill | 44.2541 | 124.1126 | *Pisaster ochraceus* | Asymptomatic |
| 173 | 5/25/2016 | Strawberry Hill | 44.2541 | 124.1126 | *Pisaster ochraceus* | Asymptomatic |
| 174 | 5/25/2016 | Strawberry Hill | 44.2541 | 124.1126 | *Pisaster ochraceus* | Asymptomatic |
| 4 | 4/9/2016 | Strawberry Hill | 44.2541 | 124.1126 | *Pisaster ochraceus* | SSWD-Affected |
| 7 | 4/9/2016 | Strawberry Hill | 44.2541 | 124.1126 | *Pisaster ochraceus* | SSWD-Affected |
| 10 | 4/9/2016 | Strawberry Hill | 44.2541 | 124.1126 | *Pisaster ochraceus* | SSWD-Affected |
| 19 | 4/9/2016 | Strawberry Hill | 44.2541 | 124.1126 | *Pisaster ochraceus* | SSWD-Affected |
| 22 | 4/9/2016 | Strawberry Hill | 44.2541 | 124.1126 | *Pisaster ochraceus* | SSWD-Affected |
| 2 | 4/9/2016 | Strawberry Hill | 44.2541 | 124.1126 | *Pisaster ochraceus* | SSWD-Affected |
| 8 | 4/9/2016 | Strawberry Hill | 44.2541 | 124.1126 | *Pisaster ochraceus* | SSWD-Affected |
| 17 | 4/9/2016 | Strawberry Hill | 44.2541 | 124.1126 | *Pisaster ochraceus* | SSWD-Affected |
| 20 | 4/9/2016 | Strawberry Hill | 44.2541 | 124.1126 | *Pisaster ochraceus* | SSWD-Affected |
| 23 | 4/9/2016 | Strawberry Hill | 44.2541 | 124.1126 | *Pisaster ochraceus* | SSWD-Affected |
| 26 | 4/9/2016 | Strawberry Hill | 44.2541 | 124.1126 | *Pisaster ochraceus* | SSWD-Affected |
| 28 | 4/24/2016 | Tokatee Klootchman | 44.2085 | 124.1155 | *Pisaster ochraceus* | Asymptomatic |
| 29 | 4/24/2016 | Tokatee Klootchman | 44.2085 | 124.1155 | *Pisaster ochraceus* | Asymptomatic |
| 30 | 4/24/2016 | Tokatee Klootchman | 44.2085 | 124.1155 | *Pisaster ochraceus* | Asymptomatic |
| 31 | 4/24/2016 | Tokatee Klootchman | 44.2085 | 124.1155 | *Pisaster ochraceus* | Asymptomatic |
| 32 | 4/24/2016 | Tokatee Klootchman | 44.2085 | 124.1155 | *Pisaster ochraceus* | Asymptomatic |
| 37 | 4/24/2016 | Tokatee Klootchman | 44.2085 | 124.1155 | *Pisaster ochraceus* | Asymptomatic |
| 41 | 4/24/2016 | Tokatee Klootchman | 44.2085 | 124.1155 | *Pisaster ochraceus* | Asymptomatic |
| 42 | 4/24/2016 | Tokatee Klootchman | 44.2085 | 124.1155 | *Pisaster ochraceus* | Asymptomatic |
| 43 | 4/24/2016 | Tokatee Klootchman | 44.2085 | 124.1155 | *Pisaster ochraceus* | Asymptomatic |
| 44 | 4/24/2016 | Tokatee Klootchman | 44.2085 | 124.1155 | *Pisaster ochraceus* | Asymptomatic |
| 33 | 4/24/2016 | Tokatee Klootchman | 44.2085 | 124.1155 | *Pisaster ochraceus* | SSWD-Affected |
| 36 | 4/24/2016 | Tokatee Klootchman | 44.2085 | 124.1155 | *Pisaster ochraceus* | SSWD-Affected |
| 38 | 4/24/2016 | Tokatee Klootchman | 44.2085 | 124.1155 | *Pisaster ochraceus* | SSWD-Affected |
| 39 | 4/24/2016 | Tokatee Klootchman | 44.2085 | 124.1155 | *Pisaster ochraceus* | SSWD-Affected |
| 40 | 4/24/2016 | Tokatee Klootchman | 44.2085 | 124.1155 | *Pisaster ochraceus* | SSWD-Affected |
| 48 | 4/24/2016 | Tokatee Klootchman | 44.2085 | 124.1155 | *Pisaster ochraceus* | SSWD-Affected |
| 53 | 4/24/2016 | Tokatee Klootchman | 44.2085 | 124.1155 | *Pisaster ochraceus* | SSWD-Affected |
| 59 | 5/8/2016 | Yachats Beach | 44.3108 | 124.1096 | *Pisaster ochraceus* | Asymptomatic |
| 60 | 5/8/2016 | Yachats Beach | 44.3108 | 124.1096 | *Pisaster ochraceus* | Asymptomatic |
| 61 | 5/8/2016 | Yachats Beach | 44.3108 | 124.1096 | *Pisaster ochraceus* | Asymptomatic |
| 62 | 5/8/2016 | Yachats Beach | 44.3108 | 124.1096 | *Pisaster ochraceus* | Asymptomatic |
| 63 | 5/8/2016 | Yachats Beach | 44.3108 | 124.1096 | *Pisaster ochraceus* | Asymptomatic |
| 72 | 5/8/2016 | Yachats Beach | 44.3108 | 124.1096 | *Pisaster ochraceus* | Asymptomatic |
| 74 | 5/8/2016 | Yachats Beach | 44.3108 | 124.1096 | *Pisaster ochraceus* | Asymptomatic |
| 76 | 5/8/2016 | Yachats Beach | 44.3108 | 124.1096 | *Pisaster ochraceus* | Asymptomatic |
| 78 | 5/8/2016 | Yachats Beach | 44.3108 | 124.1096 | *Pisaster ochraceus* | Asymptomatic |
| 80 | 5/8/2016 | Yachats Beach | 44.3108 | 124.1096 | *Pisaster ochraceus* | Asymptomatic |
| 181 | 7/18/2016 | Yachats Beach | 44.3108 | 124.1096 | *Pisaster ochraceus* | Asymptomatic |
| 182 | 7/18/2016 | Yachats Beach | 44.3108 | 124.1096 | *Pisaster ochraceus* | Asymptomatic |
| 183 | 7/18/2016 | Yachats Beach | 44.3108 | 124.1096 | *Pisaster ochraceus* | Asymptomatic |
| 184 | 7/18/2016 | Yachats Beach | 44.3108 | 124.1096 | *Pisaster ochraceus* | Asymptomatic |
| 185 | 7/18/2016 | Yachats Beach | 44.3108 | 124.1096 | *Pisaster ochraceus* | Asymptomatic |
| 71 | 5/8/2016 | Yachats Beach | 44.3108 | 124.1096 | *Pisaster ochraceus* | SSWD-Affected |
| 73 | 5/8/2016 | Yachats Beach | 44.3108 | 124.1096 | *Pisaster ochraceus* | SSWD-Affected |
| 138 | 5/24/2016 | Yachats Beach | 44.3108 | 124.1096 | *Pisaster ochraceus* | SSWD-Affected |
| 139 | 5/24/2016 | Yachats Beach | 44.3108 | 124.1096 | *Pisaster ochraceus* | SSWD-Affected |
| 140 | 5/24/2016 | Yachats Beach | 44.3108 | 124.1096 | *Pisaster ochraceus* | SSWD-Affected |
| 141 | 5/24/2016 | Yachats Beach | 44.3108 | 124.1096 | *Pisaster ochraceus* | SSWD-Affected |
| 70 | 5/8/2016 | Yachats Beach | 44.3108 | 124.1096 | *Pisaster ochraceus* | SSWD-Affected |
| 77 | 5/8/2016 | Yachats Beach | 44.3108 | 124.1096 | *Pisaster ochraceus* | SSWD-Affected |
| 79 | 5/8/2016 | Yachats Beach | 44.3108 | 124.1096 | *Pisaster ochraceus* | SSWD-Affected |
| 95 | 5/8/2016 | Yachats Beach | 44.3108 | 124.1096 | *Pisaster ochraceus* | SSWD-Affected |
| 97 | 5/8/2016 | Yachats Beach | 44.3108 | 124.1096 | *Pisaster ochraceus* | SSWD-Affected |
| LK17-4 | 7/8/2017 | Lime Kiln Point, San Juan County, Washington | 48.5157 | 123.1524 | *Leptasterias sp.* | SSWD-Affected |
| PA457 | 5/28/2017 | Palmer’s Point, Humboldt County | 41.1297 | 124.1656 | *Leptasterias sp.* | Asymptomatic |
| PA474 | 5/28/2017 | Palmer’s Point, Humboldt County | 41.1297 | 124.1656 | *Leptasterias sp.* | Asymptomatic |
| PA463 | 5/28/2017 | Palmer’s Point, Humboldt County | 41.1297 | 124.1656 | *Leptasterias sp.* | SSWD-Affected |
| PPN472 | 6/25/2017 | Pigeon Point North | 37.1836 | 122.3959 | *Leptasterias sp.* | Asymptomatic |
| PPN485 | 7/24/2017 | Pigeon Point North | 37.1836 | 122.3959 | *Leptasterias sp.* | Asymptomatic |
| PPN 414 | 1/29/2017 | Pigeon Point North | 37.1836 | 122.3959 | *Leptasterias sp.* | SSWD-Affected |
| PPN438 | 6/24/2017 | Pigeon Point North | 37.1836 | 122.3959 | *Leptasterias sp.* | SSWD-Affected |
| PPN489 | 7/24/2017 | Pigeon Point North | 37.1836 | 122.3959 | *Leptasterias sp.* | SSWD-Affected |
| PPS20 | 1/28/2017 | Pigeon Point South | 37.1826 | 122.3922 | *Leptasterias sp.* | Asymptomatic |
| PPS17 | 1/28/2017 | Pigeon Point South | 37.1826 | 122.3922 | *Leptasterias sp.* | SSWD-Affected |
| SCT72 | 5/27/2017 | Scotty Point, Humboldt County | 41.1006 | 124.1636 | *Leptasterias sp.* | Asymptomatic |
