# Supplementary material
Source: Frontiers journal article supplement (https://www.frontiersin.org/articles/335838)
Supplement: Table_5.DOCX [file Table_5.DOCX]

**Supplemental Table 5:** Recruitment of RNA viral contigs PhaDiV1 and PhaDiV3 against transcriptomes prepared from *Pycnopodia helianthoides* taken from the Seattle Aquarium (Gudenkauf & Hewson, 2015) and Friday Harbor Laboratories (Fuess et al., 2015).

|  | **Gudenkauf & Hewson, 2015** | | | | **Fuess et al., 2015** | | | | | | |
| --- | --- | --- | --- | --- | --- | --- | --- | --- | --- | --- | --- |
| **Library Name** | **T1 - Asymptomatic** | **T2 - Asymptomatic** | **T3 - SSWD-Affected** | **T4-SSWD Affected** | **Ccontrol FHL** | **Control DB** | **Control PH** | **Treated L** | **Treated PH** | **Treated FHL** | **Phel Treated FHL** |
| **Accession** | **SRR1427060** | **SRR1427061** | **SRR1427062** | **SRR1427063** | **SRR1708296** | **SRR1708289** | **SRR1708282** | **SRR1708266** | **SRR1708189** | **SRR1708168** | **SRR1708165** |
| **PhaDiV1** | 633 | 10,674 | 11,627 | 24 | 0 | 0 | 4 | 0 | 0 | 0 | 0 |
| **PhaDiV3** | 24 | 29,012 | 55 | 12 | 8 | 0 | 2 | 0 | 0 | 0 | 0 |
| **Total Reads** | 1,465,908 | 598,958 | 1,453,047 | 2,047,460 | 11,952,620 | 23,172,864 | 87,027,784 | 1,931,939 | 9,752,597 | 794,848 | 794,848 |
