# Supplementary material
Source: Frontiers journal article supplement (https://www.frontiersin.org/articles/335838)
Supplement: Table_7.DOCX [file Table_7.DOCX]

**Supplemental Table 7:** Phylogenetic characteristics of asteroid-associated RNA viruses prepared from asymptomatic and SSWD-affected *P. ochraceus*.

|  |  | **Uncultivated** | | | | **Cultivated** | | | | |
| --- | --- | --- | --- | --- | --- | --- | --- | --- | --- | --- |
|  | **Len. (nt)** | **Best hit** | **Accession** | **e-value** | **% ID** | **Best hit** | **Accession** | **e-value** | **% ID** | **Family** |
| ARV1 | 3301 | Beihai tombus-like virus 4 | YP_009330016.1 | 0 | 76 | Potato necrosis virus | YP_009246408.1 | 1.00E-68 | 38 | Tombusvirus |
| ARV2 | 8436 | Beihai picorna-like virus 11 | YP_009333581.1 | 0 | 63 | *Asterionellopsis glacialis* RNA virus | YP_009047194.1 | 0 | 52 | Picornavirus |
| ARV3 | 1236 | Barns Ness breadcrumb sponge aquatic picorna-like virus 4 | ASM94058.1 | 8.00E-84 | 54 | *Asterionellopsis glacialis* RNA virus | YP_009047194.2 | 1.00E-32 | 35 | Picornavirus |
| ARV4 | 2049 | Barns Ness breadcrumb sponge aquatic picorna-like virus 4 | ASM94058.2 | 0 | 76 | *Asterionellopsis glacialis* RNA virus | YP_009047194.3 | 4.00E-77 | 36 | Picornavirus |
