# Supplementary material
Source: Frontiers journal article supplement (https://www.frontiersin.org/articles/335838)
Supplement: Table_10.DOCX [file Table_10.DOCX]

**Supplemental Table 10:** Samples used to determine the abundance of PhaDiV1 and PhaDiV3.

| **Date** | **Species** | **Location** | **Asymptomatic or Symptomatic** |
| --- | --- | --- | --- |
| 17-Oct-13 | *Evasterias troscheli* | Cape Roger Curtis, BC | A |
| 26-Oct-13 | *Evasterias troscheli* | Seattle Aquarium | A |
| 9-Oct-13 | *Evasterias troscheli* | Friday Harbor WA | A |
| 11-Oct-13 | *Evasterias troscheli* | Friday Harbor WA | A |
| 17-Oct-13 | *Evasterias troscheli* | Cape Roger Curtis, BC | S |
| 17-Oct-13 | *Evasterias troscheli* | Cape Roger Curtis, BC | S |
| 26-Oct-13 | *Evasterias troscheli* | Seattle Aquarium | S |
| 31-Jan-14 | *Evasterias troscheli* | Port Townsend WA | S |
| 14-Feb-14 | *Evasterias troscheli* | Bear Cove, Port Hardy, BC | S |
| 15-Nov-13 | *Evasterias troscheli* | Puget Sound WA | S |
| 29-Dec-14 | *Evasterias troscheli* | Freshwater Bay WA | S |
| 27-Mar-14 | *Pisaster ochraceus* | Terrace Point CA | A |
| 27-Mar-14 | *Pisaster ochraceus* | Terrace Point CA | A |
| 27-Mar-14 | *Pisaster ochraceus* | Terrace Point CA | A |
| 27-Mar-14 | *Pisaster ochraceus* | Terrace Point CA | A |
| 27-Mar-14 | *Pisaster ochraceus* | Terrace Point CA | A |
| 22-Nov-13 | *Pisaster ochraceus* | Vancouver Aquarium | S |
| 28-Jan-14 | *Pisaster ochraceus* | Alki WA | S |
| 28-Jan-14 | *Pisaster ochraceus* | Alki WA | S |
| 28-Jan-14 | *Pisaster ochraceus* | Alki WA | S |
| 28-Jan-14 | *Pisaster ochraceus* | Alki WA | S |
| 28-Jan-14 | *Pisaster ochraceus* | Alki WA | S |
| 12-Feb-14 | *Pisaster ochraceus* | Terrace Point CA | S |
| 25-Feb-14 | *Pisaster ochraceus* | Terrace Point CA | S |
| 25-Feb-14 | *Pisaster ochraceus* | Terrace Point CA | S |
| 17-Oct-13 | *Pycnopodia helianthoides* | Popham Island, BC | A |
| 26-Oct-13 | *Pycnopodia helianthoides* | Seattle Aquarium | A |
| 26-Oct-13 | *Pycnopodia helianthoides* | Seattle Aquarium | A |
| 26-Oct-13 | *Pycnopodia helianthoides* | Seattle Aquarium | A |
| 26-Oct-13 | *Pycnopodia helianthoides* | Seattle Aquarium | A |
| 26-Oct-13 | *Pycnopodia helianthoides* | Seattle Aquarium | A |
| 16-Oct-13 | *Pycnopodia helianthoides* | Vancouver Aquarium | A |
| 26-Oct-13 | *Pycnopodia helianthoides* | Seattle Aquarium | S |
| 26-Oct-13 | *Pycnopodia helianthoides* | Seattle Aquarium | S |
| 26-Oct-13 | *Pycnopodia helianthoides* | Seattle Aquarium | S |
| 26-Oct-13 | *Pycnopodia helianthoides* | Seattle Aquarium | S |
| 1-Nov-13 | *Pycnopodia helianthoides* | Vancouver Aquarium | S |
| 1-Nov-13 | *Pycnopodia helianthoides* | Vancouver Aquarium | S |
| 6-Nov-13 | *Pycnopodia helianthoides* | Vancouver Aquarium | S |
| 17-Nov-13 | *Pycnopodia helianthoides* | Vancouver Aquarium | S |
| 17-Nov-13 | *Pycnopodia helianthoides* | Vancouver Aquarium | S |
| 18-Nov-13 | *Pycnopodia helianthoides* | Puget Sound WA | S |
| 18-Nov-13 | *Pycnopodia helianthoides* | Puget Sound WA | S |
| 25-Nov-13 | *Pycnopodia helianthoides* | Vancouver Aquarium | S |
| 22-Dec-13 | *Pycnopodia helianthoides* | Vancouver Aquarium | S |
| 31-Dec-13 | *Pycnopodia helianthoides* | Vancouver Aquarium | S |
| 20-Jan-14 | *Pycnopodia helianthoides* | Puget Sound WA | S |
| 29-Jan-14 | *Pycnopodia helianthoides* | Salisburg WA | S |
| 25-Feb-14 | *Pycnopodia helianthoides* | Carpenteria CA | S |
| 5-Mar-14 | *Pycnopodia helianthoides* | Monterey Bay Aquarium | S |
| 28-Mar-14 | *Pycnopodia helianthoides* | San Juan Island WA | S |
| 28-Mar-14 | *Pycnopodia helianthoides* | San Juan Island WA | S |
| 29-Mar-14 | *Pycnopodia helianthoides* | Port Hadlock WA | S |
| 31-Mar-14 | *Pycnopodia helianthoides* | San Juan Island WA | S |
| 31-Mar-14 | *Pycnopodia helianthoides* | San Juan Island WA | S |
| 31-Mar-14 | *Pycnopodia helianthoides* | Port Hadlock WA | S |
| 31-Mar-14 | *Pycnopodia helianthoides* | San Juan Island WA | S |
| 31-Mar-14 | *Pycnopodia helianthoides* | San Juan Island WA | S |
| 31-Mar-14 | *Pycnopodia helianthoides* | San Juan Island WA | S |
| 31-Mar-14 | *Pycnopodia helianthoides* | San Juan Island WA | S |
| 1-Apr-14 | *Pycnopodia helianthoides* | San Juan Island WA | S |
| 1-Apr-14 | *Pycnopodia helianthoides* | San Juan Island WA | S |
| 1-Apr-14 | *Pycnopodia helianthoides* | San Juan Island WA | S |
| 1-Apr-14 | *Pycnopodia helianthoides* | San Juan Island WA | S |
| 1-Apr-14 | *Pycnopodia helianthoides* | San Juan Island WA | S |
| 1-Apr-14 | *Pycnopodia helianthoides* | San Juan Island WA | S |
| 2-Apr-14 | *Pycnopodia helianthoides* | San Juan Island WA | S |
| 2-Apr-14 | *Pycnopodia helianthoides* | San Juan Island WA | S |
| 2-Apr-14 | *Pycnopodia helianthoides* | San Juan Island WA | S |
