# Supplementary material
Source: Frontiers journal article supplement (https://www.frontiersin.org/articles/335838)
Supplement: Table_11.DOCX [file Table_11.DOCX]

**Supplemental Table 11:** Primers, probe and standard used for quantitative reverse transcriptase PCR (qRT-PCR) of PhaDiV1 and PhaDiV3

| **Phylotype** | **Forward (5-3')** | **Reverse (5-3')** | **Probe (5-3')** | **Standard (5'-3')** | **Annealing Temp** |
| --- | --- | --- | --- | --- | --- |
| PhaDiV1 | TCAAGAGGGCATGTAATGAAGTT | AGTGAGCACTTGGCGATAGTAAG | GCCAACATCTAGGCAGAGCCCCTAA | GATCAAGAGGGCATGTAATGAAGTTAGCCAACATCTAGGCAGAGCCCCTAAAGACTCTTACTATCGCCAAGTGCTCACTATC | 60 |
| PhaDiV3 | GCAGTAAGAGCCAGAAACCTACA | CATGGAGGAAGCCCTATTTTATC | GGTACGGCTTGACTTACACGGGACC | TTGCAGTAAGAGCCAGAAACCTACAGTTCTCTCTATTTCTAGAGAACTAAACAGGTACGGCTTGACTTACACGGGACCAGATAAAATAGGGCTTCCTCCATGGA | 62 |
