# Supplementary material
Source: Frontiers journal article supplement (https://www.frontiersin.org/articles/335838)
Supplement: Table_12.DOCX [file Table_12.DOCX]

**Supplemental Table 12:** Viral metagenome characteristics for samples prepared to survey geographic diversity of densoviruses. Annotation was initially performed by BLASTx against the non-redundant database at NCBI. Hits to viral proteins were then checked by BLASTn against the non-redundant database to eliminate spurious hits.

| **Library Name** | **Species** | **Date of Collection** | **Location of Collection** | **Total Library Reads** | **Total Assembled Reads** | **Total # Contigs** | **Total Annotated Reads** | **Total Reads Associated with Viruses** |
| --- | --- | --- | --- | --- | --- | --- | --- | --- |
| V34 | *Asterias rubrens* | 3/31/2014 | Texel, Netherlands | 3,481,106 | 1,304,779 | 855 | 335,699 | 0 |
| V35 | *Asterias rubrens* | 4/19/2014 | Oresund, Denmark | 10,287,064 | 4,607,606 | 13,333 | 1,015,968 | 0 |
| V38 | *Henricia ornata* | 5/14/2014 | False Bay, South Africa | 6,117,306 | 2,659,482 | 17,406 | 1,307,068 | 0 |
| V39 | *Matasterias muizenberg* | 5/14/2014 | False Bay, South Africa | 4,262,092 | 1,043,477 | 218 | 193,484 | 0 |
| V40 | *Acanthaster planci* | 6/6/2014 | Townsville, Australia | 4,633,334 | 2,427,696 | 20,255 | 1,300,120 | 0 |
| V41 | *Luidia maculata* | 4/3/2014 | Hong Kong | 813,482 | 224,476 | 324 | 63,902 | 465 |
| V42 | *Astropecten polyacanthus* | 4/3/2014 | Hong Kong | 7,659,024 | 2,645,206 | 10,184 | 938,191 | 148 |
| V43 | *Ophidaster spp.* | 3/3/2014 | Okinawa, Japan | 5,282,236 | 2,650,551 | 20,762 | 1,152,168 | 0 |
| V45 | *Echinaster luzonicus* | 3/3/2014 | Okinawa, Japan | 4,903,034 | 1,476,777 | 8,636 | 475,716 | 0 |
| V46 | *Linckia laevigata* | 5/15/2014 | Chuuk, Federated States of Micronesia | 4,748,256 | 1,872,843 | 13,193 | 683,165 | 0 |
| V47 | *Marthasterias glacialis* | 5/16/2014 | Valparaiso, Chile | 3,800,106 | 1,257,444 | 3,923 | 439,817 | 0 |
| V48 | *Asterias rubrens* | 5/16/2014 | Valparaiso, Chile | 1,428,516 | 442,789 | 44 | 100,501 | 0 |
| V49 | *Heliaster helianthus* | 5/16/2014 | Valparaiso, Chile | 6,730,562 | 2,749,977 | 14,489 | 947,073 | 0 |
| V50 | *Parvulastra exigua* | 5/14/2014 | False Bay, South Africa | 4,058,616 | 1,287,752 | 9,974 | 449,950 | 55 |
| V51 | *Patiriella pseudoexigua* | 3/17/2014 | Kaosiung, Republic of China | 7,775,334 | 3,662,322 | 21,452 | 1,401,032 | 0 |
