# Supplementary material
Source: Frontiers journal article supplement (https://www.frontiersin.org/articles/335838)
Supplement: Table_14.DOCX [file Table_14.DOCX]

**Supplemental Table 14**: Primers used to amplify genome fragments of SSaDV in historical and geographic samples. Five PCR amplicons were attempted for each sample in which VP4 and NS1 were detected by qPCR (Hewson et al., 2014): VP1 (VP1F+VP1R); VP4 (VP4F + VP4R); NS1 (NS1F+NS1R); G1 (VP1F2+VP4R2); and G2 (VP4F2+NS1R2).

| **Primer Name** | **Sequence (5’-3’)** | **Tm** |
| --- | --- | --- |
| VP1F2 | TCGTGCTCTCTTGCTATATCGT | 60.8 |
| VP1R | TGATCATAGATATATTGGTCCTGGT | 59.7 |
| VP1F | TGAATAACGTCAGTAAGAAATTCACC | 59.9 |
| VP4R2 | CCACAACTGGCTATCCCACT | 62.4 |
| VP4F2 | GAGCATCAGCAGGATCATCA | 60.4 |
| VP4R | TCCTGCTGGTAGTTACATAAAGTCTG | 63 |
| VP4F | CCCAAGTGCTATCATTAGAGTTCA | 61.2 |
| NS1R2 | CCGTCCTTTCGTGCAATAAT | 58.4 |
| NS1R | TGCAAGCGGATTAGGTTTCT | 58.4 |
| NS1F | AATCAGAGATGTCGGGATCG | 60.4 |
